# Supplementary material for: Fabrication and Optimization of Essential-Oil-Loaded Nanoemulsion Using Box–Behnken Design against Staphylococos aureus and Staphylococos epidermidis Isolated from Oral Cavity
Source: MDPI journal article supplement (doi:10.3390/pharmaceutics14081640), 2022-08-05
Supplement: s1 [file s1]

# Fabrication and optimization of essential oil loaded nanoemulsion using Box-Behnken design against *Staphylococcus aureus* and *Staphylococcus epidermidis* isolated from oral cavity.

Niamat Ullah<sup>1</sup>, Adnan Amin <sup>1\*</sup>, Rana A. Alamoudi <sup>2</sup>, Sheikh Abdur Rasheed\* <sup>3</sup>, Ruaa A. Alamoudi <sup>4</sup>, Asif Nawaz <sup>5</sup>, Muhammad Raza<sup>5</sup>, Touseef Nawaz <sup>1</sup>, Saiqa Ishtiaq <sup>6</sup>, Syed Shakil Abbas <sup>7</sup>.

## Supplementary Information

### GCMS Analysis of Clove

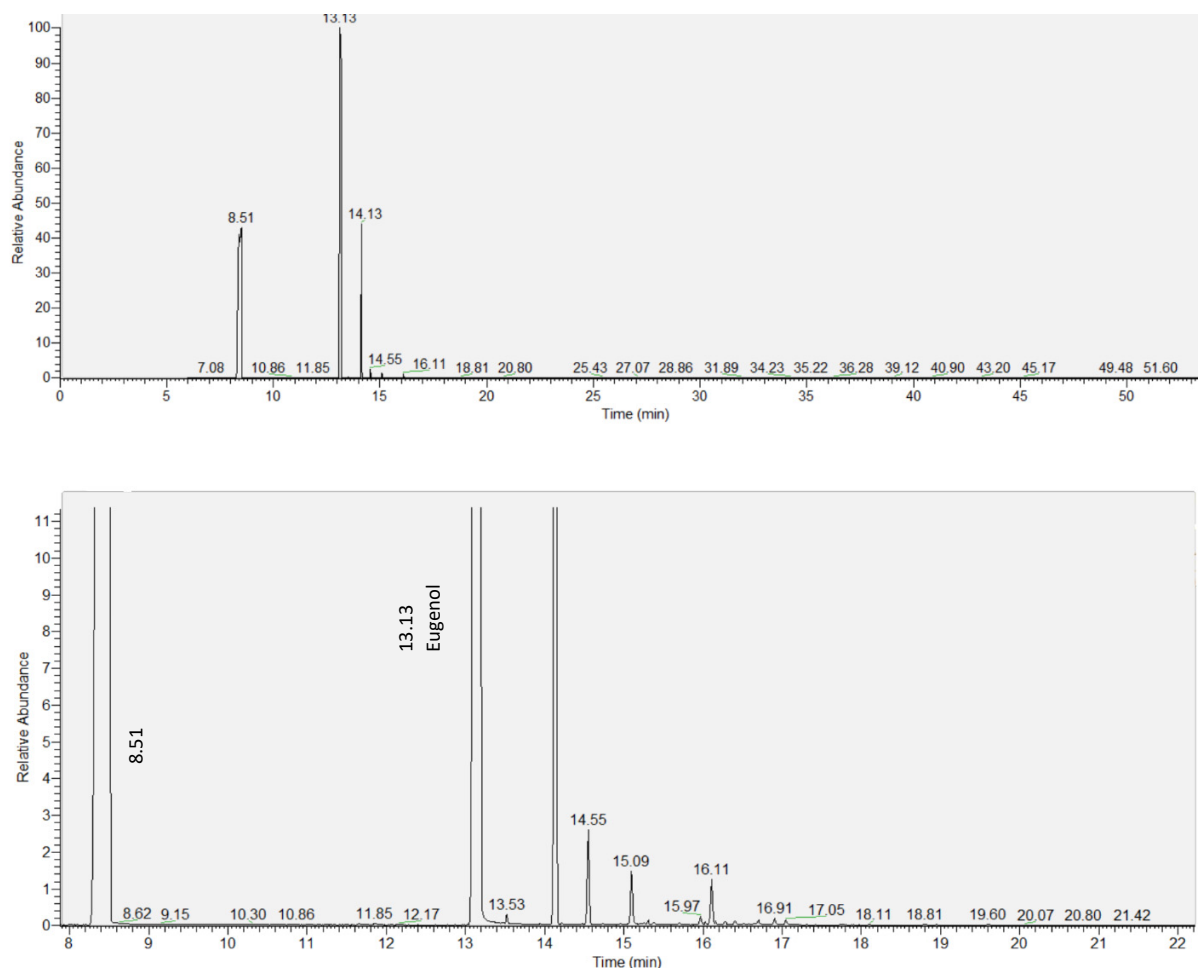

Figure S1. GC-MS Profile of clove essential oil (Adopted from Rafey et al., 2021)

**Table: GC-MS analysis of Clove Oil**

| <b>S.No</b> | <b>Compound</b>     | <b>Retention time</b> | <b>RI</b>   | <b>Conc %</b> |
|-------------|---------------------|-----------------------|-------------|---------------|
| 1           | Benzyl alcohol      | 8.50                  | 1025        | traces        |
| 2           | Methyl salicylate   | 10.86                 | 1021        | 0.05          |
| 3           | Limonene            | 11.66                 | 1021        | traces        |
| 4           | Cubebene            | 11.86                 | 1022        | traces        |
| 5           | <b>Eugenol</b>      | <b>13.13</b>          | <b>1132</b> | <b>75</b>     |
| 6           | Iso-eugenol         | 13.53                 | 1011        | 11.08         |
| 7           | Caryophyllene       | 14.13                 | 1322        | 10.2          |
| 8           | $\alpha$ -Humulene  | 14.55                 | 1422        | 1.22          |
| 9           | Eugenol acetate     | 15.09                 | 1357        | 12.2          |
| 10          | 2-carene            | 16.11                 | traces      | traces        |
| 11          | $\beta$ -Humulene   | 16.28                 | 1021        | 0.84          |
| 12          | Cubenol             | 16.40                 | 1024        | 0.02          |
| 13          | $\alpha$ -Farnesene | 16.70                 | 1254        | 0.21          |
| 14          | Caryophyllene oxide | 16.91                 | 1233        | 0.34          |

(Adopted from Rafey et al., 2021)

**Table GCMS component Analysis of Cinnamon oil**

| S.No | Compound                    | Retention time | RI          | Conc %      |
|------|-----------------------------|----------------|-------------|-------------|
| 1    | $\alpha$ -Pinene            | 5.66           | 899         | 1.3         |
| 2    | Benzaldehyde                | 6.40           | 963         | 0.3         |
| 3    | p-Cymene                    | 7.82           | 1025        | 1.9         |
| 4    | Limonene                    | 7.93           | 1075        | 1.2         |
| 5    | Eucalyptol                  | <b>8.08</b>    | <b>1084</b> | <b>5.4</b>  |
| 6    | c-Terpinene                 | 8.66           | 1121        | 0.4         |
| 7    | Linalool                    | 9.86           | 1188        | 7           |
| 8    | Isoborneol                  | 11.64          | 1275        | 0.8         |
| 9    | <b>(E)-cinnamaldehyde</b>   | <b>15.22</b>   | <b>1414</b> | <b>71.5</b> |
| 10   | Eugenol                     | 16.90          | 1469        | 4.6         |
| 11   | $\beta$ -Caryophyllene      | 18.58          | 1518        | 6.4         |
| 12   | Acetic acid, cinnamyl ester | 19.23          | 1536        | 0.5         |
| 13   | $\alpha$ -Humulene          | 19.47          | 1543        | 1.7         |
| 14   | $\delta$ -Cadinene          | 20.97          | 1581        | 1.4         |
| 15   | trans-Calamenene            | 21.10          | 1585        | 0.7         |
| 16   | Caryophyllene oxide         | 22.61          | 1621        | 0.5         |
| 17   | Benzyl benzoate             | 26.82          | 1710        | 0.5         |

(Adopted from Alizadeh Behbahani et al., 2020)

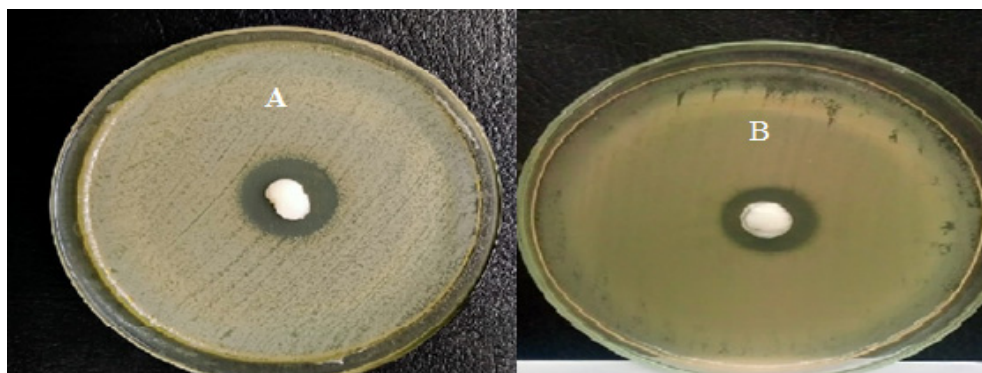

Figure S2: (A) antibacterial activity of essential oil loaded nanoemulsion against *S.aureus*(B) antibacterial activity against *S.epidermidis*.

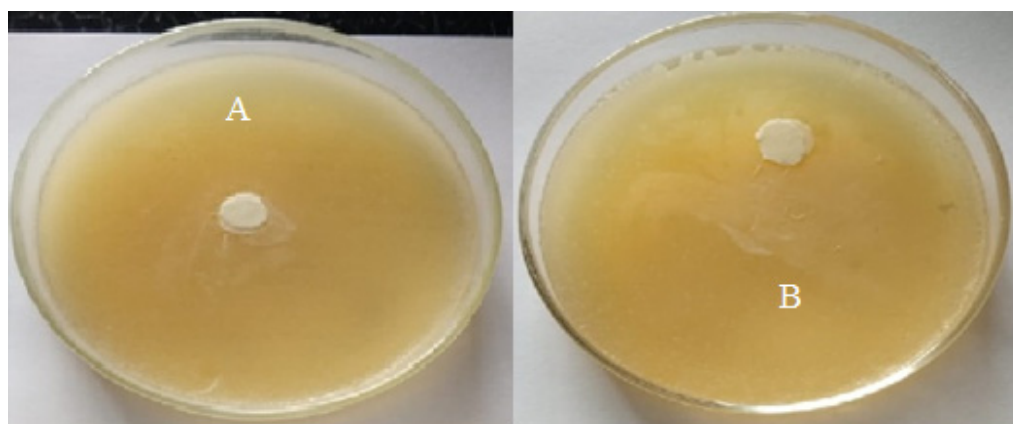

Figure S3: (A) antibacterial activity of unloaded nanoemulsion against *S.aureus* (B) antibacterial activity of unloaded nanoemulsion against *S.epidermidis*.

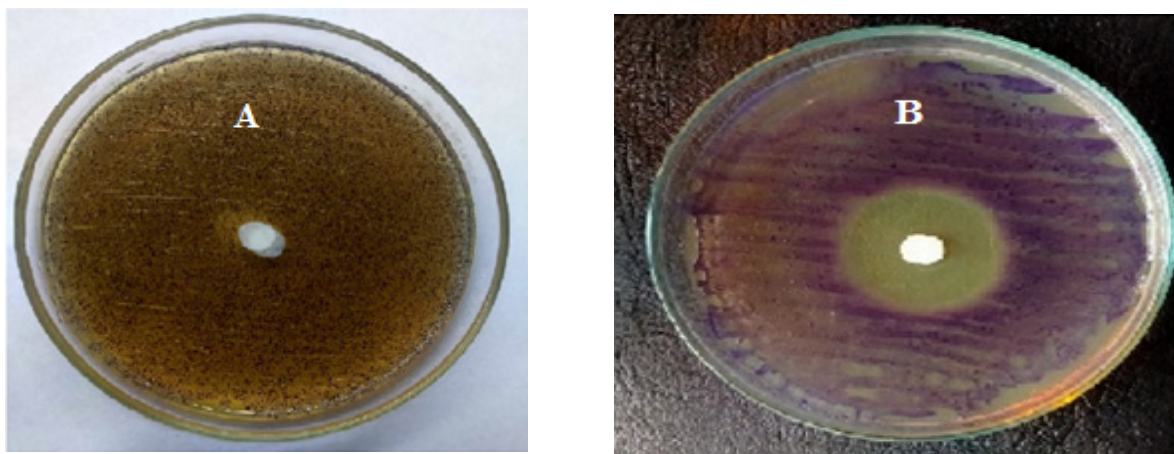

Figure S4: (A) Antiquorum sensing activity of unloaded nanoemulsion and (B) Antiquorum sensing activity of essential oil loaded nanoemulsion.

## References

Rafey A., Amin A., Kamran M., Haroon U., Farooq K., Foubert K., Pieters L. Plant Origin Antibiotics Against Periodontal Infections; Antibiofilm, Anti-Quorum Sensing, Molecular Docking Studies and Characterization Of Active Constituents". *Antibiotics* 2021, 10(12), 1504.

Alizadeh Behbahani B, Falah F, Lavi Arab F, Vasiee M, Tabatabaee Yazdi F. Chemical Composition and Antioxidant, Antimicrobial, and Antiproliferative Activities of *Cinnamomum zeylanicum* Bark Essential Oil. *Evid Based Complement Alternat Med.* 2020;2020:5190603. Published 2020 Apr 29. doi:10.1155/2020/5190603
